# Supplementary material for: Magnetic nanoparticle-loaded polymer nanospheres as magnetic hyperthermia agents
Source: Royal Society of Chemistry journal article supplement (doi:10.1039/c3tb21146k), 2013-10-29
Supplement: c3tb21146k.pdf [file c3tb21146k.pdf]

# Supplementary Information For

## Magnetic nanoparticles-loaded Polymer Nanospheres as Magnetic Hyperthermia Agent

*Xiao Li Liu,<sup>a, b</sup> Eugene Shi Guang Choo,<sup>b</sup> Anansa S. Ahmed,<sup>c</sup> Ling Yun  
Zhao,<sup>d</sup> Yang Yong,<sup>b</sup> Raju V. Ramanujan,<sup>c</sup> Jun Min Xue,<sup>b</sup> Dai Di Fan,<sup>a</sup> Hai  
Ming Fan,<sup>\*a</sup> and Jun Ding<sup>\*b</sup>*

<sup>a</sup> Shaanxi Key Laboratory of Degradable Biomedical Materials, School of Chemical Engineering, Northwest University, Xi'an, Shaanxi 710069, China.

<sup>b</sup> Department of Materials Science & Engineering, Faculty of Engineering, National University of Singapore, 7 Engineering Drive 1, Singapore 117574.

<sup>c</sup> School of Materials Science and Engineering Nanyang Technological University Block N4.1, Nanyang Avenue, 639798, Singapore.

<sup>d</sup> Institute of Medical Physics and Engineering, Key Laboratory of Particle & Radiation Imaging, Ministry of Education, Department of Engineering Physics, Tsinghua University, Beijing, China, 100084

\*Corresponding author: Prof. Dr. H.M. Fan, [fanhm@nwu.edu.cn](mailto:fanhm@nwu.edu.cn)

Prof. Dr. J. Ding, [msedingj@nus.edu.sg](mailto:msedingj@nus.edu.sg)

## S1. Calculation of Intra-Particle Distance between MnFe<sub>2</sub>O<sub>4</sub> nanoparticles

Firstly, the average number of MnFe<sub>2</sub>O<sub>4</sub> nanoparticles in a sphere was estimated on the basis of MnFe<sub>2</sub>O<sub>4</sub> nanoparticles-loading obtained from TGA measurements. The densities of MnFe<sub>2</sub>O<sub>4</sub> and the polymer matrix were taken be 5.0 g/cm<sup>-3</sup> and 1.3 g/cm<sup>-3</sup>, respectively, as adopted from common online resources. ( $\rho$  is density,  $m$  is mass, and  $wt\%$  is MnFe<sub>2</sub>O<sub>4</sub> nanoparticles loading (TGA results))

$$\text{Volume of sphere: } V = \frac{4}{3}\pi R^3$$

$$\text{Volume of MnFe}_2\text{O}_4: V = \frac{4}{3}\pi r^3$$

$$\text{Volume: } V = \frac{m}{\rho}$$

$$\frac{V_{MNP}}{V_{MNC}} = \frac{m_{MNP}}{m_{MNC}} \times \frac{\rho_{MNC}}{\rho_{MNP}} = \frac{m_{MNP}}{m_{MNP} + m_{polymer}} \times \frac{\rho_{MnFe2O4} \times wt\% + \rho_{polymer} \times (1 - wt\%)}{\rho_{MnFe2O4}} = n_{MNP} \frac{r^3}{R^3}$$

$$wt\% = \frac{m_{MNP}}{m_{MNP} + m_{polymer}}$$

No. of MnFe<sub>2</sub>O<sub>4</sub> nanoparticles per sphere:

$$n_{MNP} = wt\% \times \frac{\rho_{MnFe2O4} \times wt\% + \rho_{polymer} \times (1 - wt\%) R^3}{\rho_{MnFe2O4} r^3}$$

The average separation distance ( $d_{sep}$ ) between the particles was estimated by assuming that the MnFe<sub>2</sub>O<sub>4</sub> nanoparticles were perfectly dispersed within the spherical nanogel matrix. Individual MnFe<sub>2</sub>O<sub>4</sub> nanoparticles occupied a volume of space,  $V_{space}$ , within the spherical matrix. The maximum volume fraction occupied by closed-packed spheres in a body

$$\text{was } \frac{\pi}{3\sqrt{2}} \approx 0.74$$

$$V_{space} = 0.74 \frac{V_{MNC}}{n_{MNP}}$$

$$r_{space} = \sqrt[3]{0.74 \frac{V_{MNC}}{n_{MNP}} \frac{3}{4\pi}}$$

$$d_{sep} = 2 \times (r_{space} - r_{MNP})$$

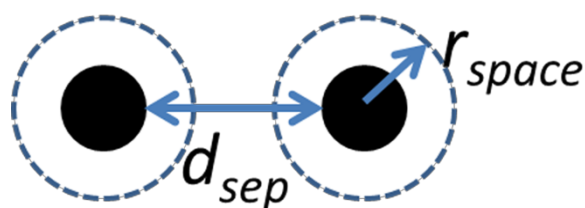

## S2. Plot of saturation magnetization against loading for MLPNs

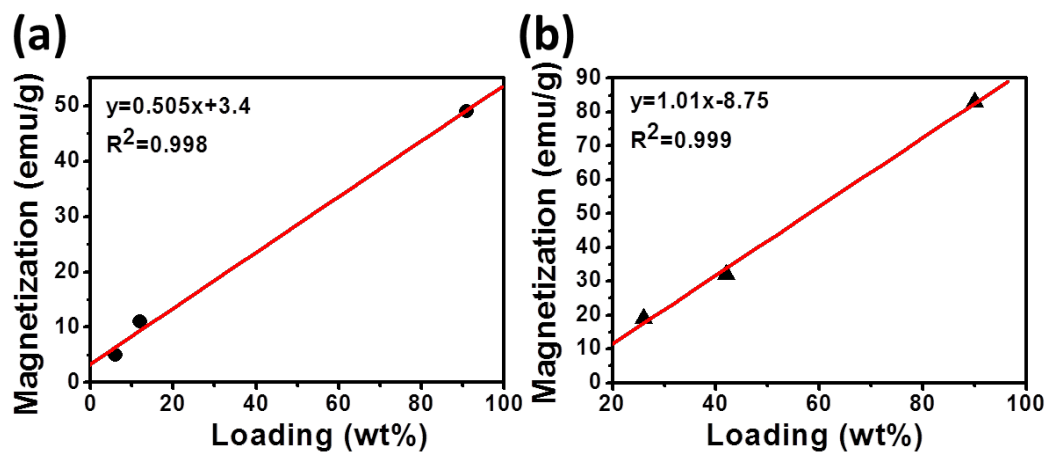

**Fig. S2.** Plot of saturation magnetization against loading wt% for MLPNs (a) 6 nm loaded samples and (b) 18 nm loaded samples.
